# Supplementary figures and images for: Temporal dynamics of tree xylem water isotopes:In-situ monitoring and modelling
Source: Copernicus journal article supplement (doi:10.5194/bg-2021-35), 2021-02-15

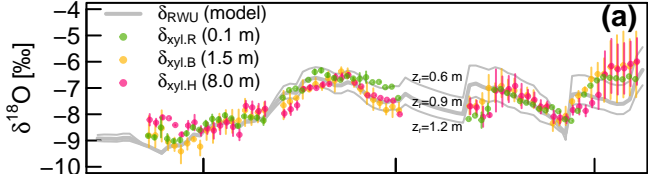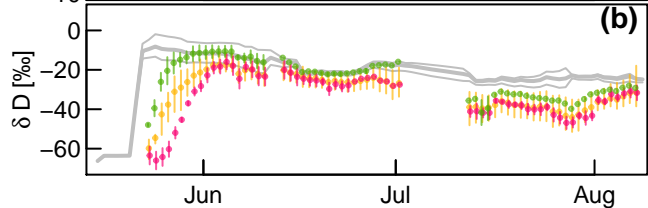

Supplement: Supplementary file 1 [file bg-2021-35-supplement.zip]

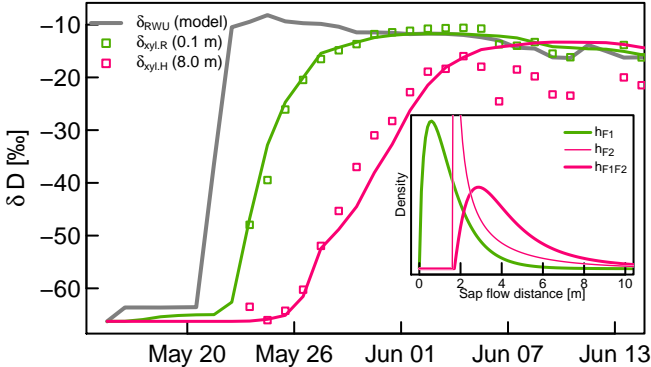

Supplement: Supplementary file 2 [file bg-2021-35-supplement.zip]

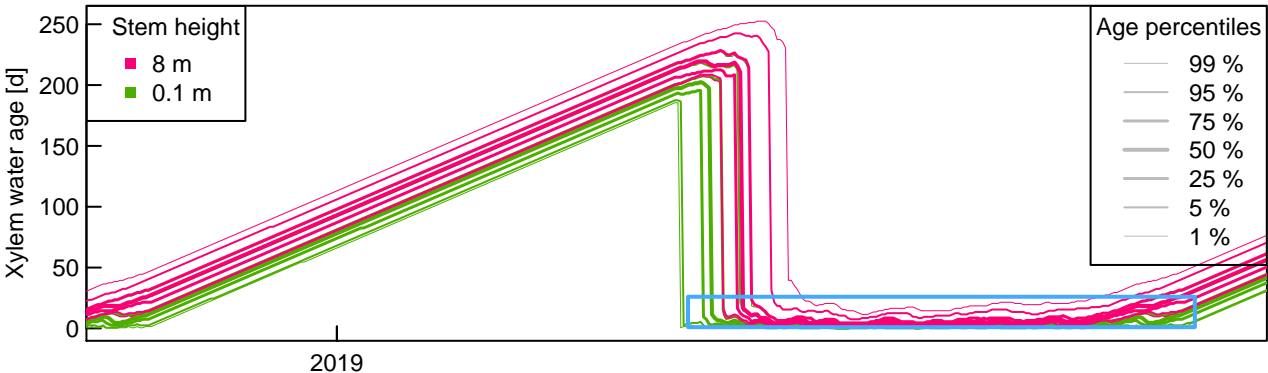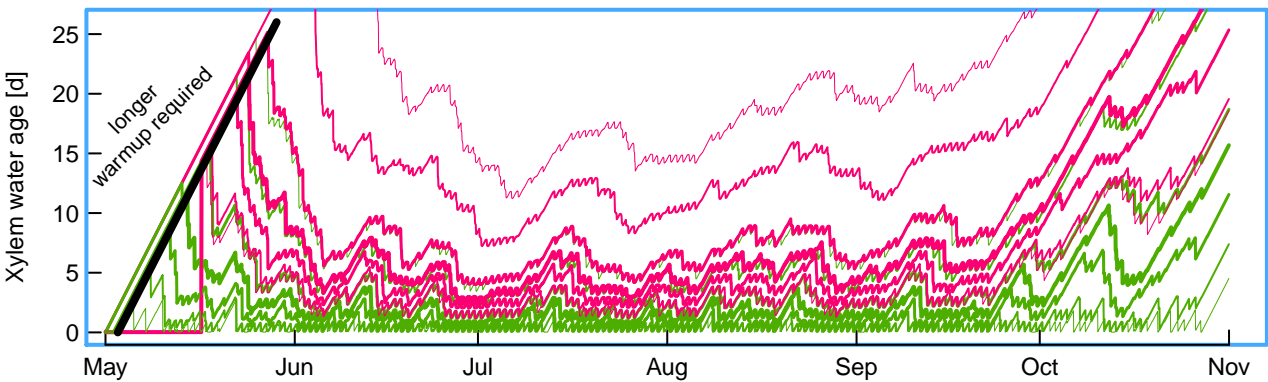

Supplement: Supplementary file 3 [file bg-2021-35-supplement.zip]
